# Supplementary material for: Quantitative analysis of “Δl = ls − lg” to coherent random lasing in solution systems with a series of solvents ordered by refractive index
Source: Royal Society of Chemistry journal article supplement (doi:10.1039/c6ra19029d), 2016-01-01
Supplement: c6ra19029d1.pdf [file c6ra19029d1.pdf]

Supporting Information

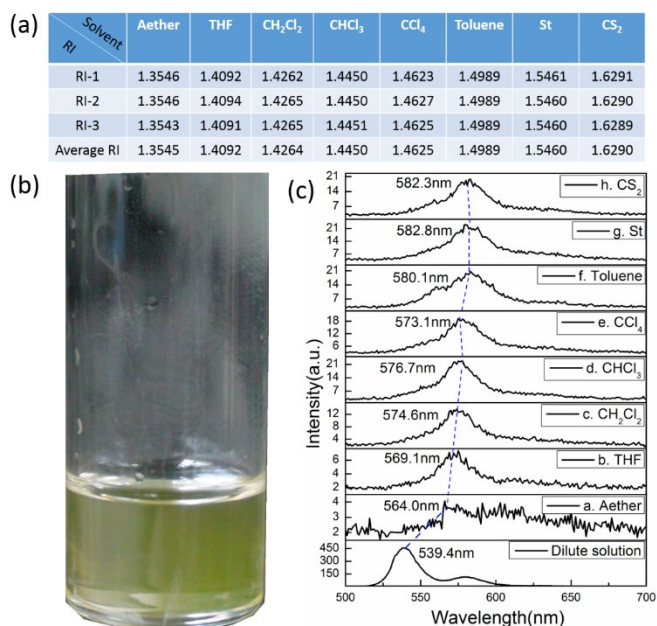

**Fig. S1** (a) The three times detection results of RI of all the solvents and the average RI of each of the solvent. (b) Photograph of  $10^{-6}$ M DPP in  $CS_2$  solution. (c) Fluorescent emission spectra of samples from a dilute solution ( $10^{-6}$ M DPP in  $CS_2$  solution) to samples *a.* Aether to *h.*  $CS_2$ .

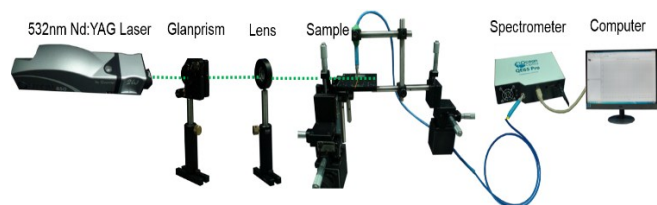

**Fig. S2** Schematic illustration of the experimental setup for detection of RL.

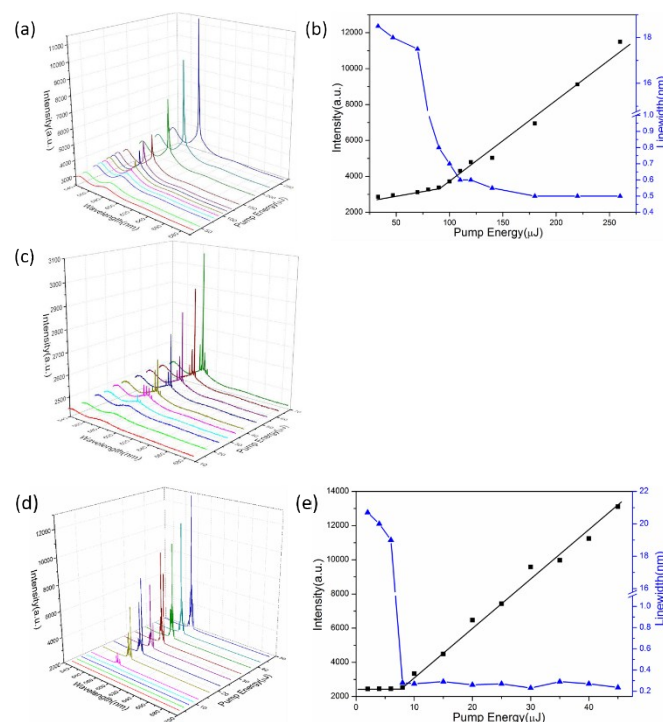

**Fig. S3** Evolution of emission spectra of  $10^{-3}$ M DPP in (a) Toluene, (c) St, (d)  $CS_2$  solution at different pump energies, respectively. Dependence of the intensity (black square) and linewidth (blue triangle) of the main peaks of the emission spectra of  $10^{-3}$ M DPP in (b) Toluene solution, (e)  $CS_2$  solution on different pump energies, respectively.

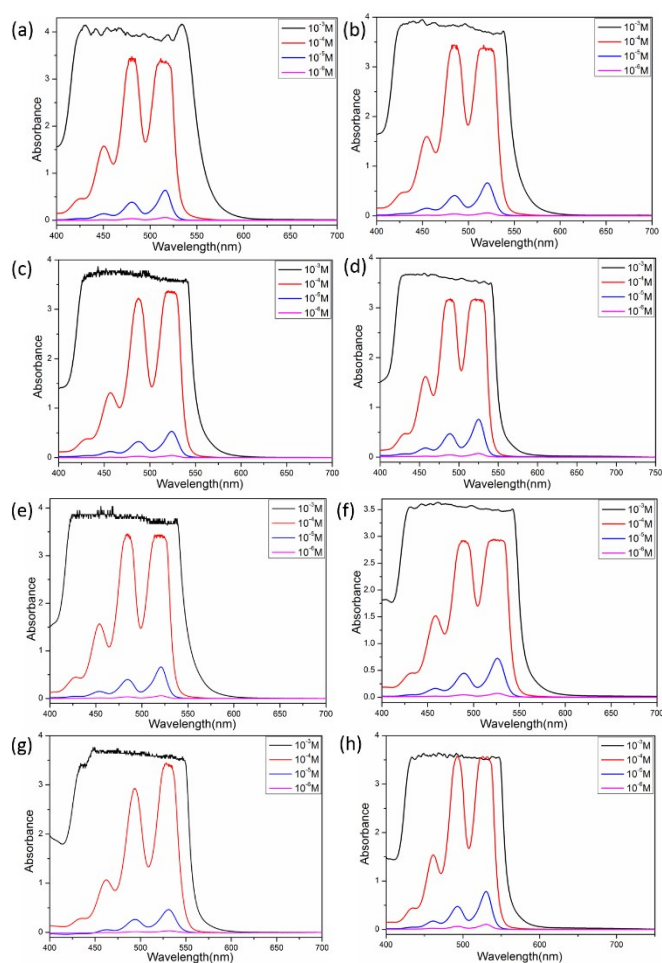

**Fig. S4** Variable concentration UV-Vis absorption spectra of DPP in (a) Aether, (b) THF, (c)  $\text{CH}_2\text{Cl}_2$ , (d)  $\text{CHCl}_3$ , (e)  $\text{CHCl}_4$ , (f) Toluene, (g) Styrene, (h)  $\text{CS}_2$  solution, respectively.
